# Supplementary material for: The controlled glycosylation of a protein with a bivalent glycan: towards a new class of glycoconjugates, glycodendriproteins
Source: Royal Society of Chemistry journal article supplement (doi:10.1039/b009184g), 2001-01-01

# Supporting Information for Davis

# **3**

1H NMR (CD3OD, 200 MHz) : 1.43 (9H, s, (CH3)3), 2.37 (6H, s, SC(O)CH3), 2.55 (2H, br t, NCH2CH2NHBoc), 2.61 (4H, br t, *J* 7 Hz, NCH2CH2NHC(O)CH2SAc x 2), 3.08 (2H, br t, *J* 7 Hz, NCH2CH2NHBoc), 3.25 (4H, br t, *J* 7 Hz, NCH2CH2NHC(O)CH2SAc x 2), 3.66 (s, 4H, NHC(O)CH2SAc x 2).

**5b**

1H NMR (CD3OD, 300 MHz) : 1.44 (9H, s, (CH3)3), 1.96, 2.04, 2.07, 2.14 (6H x 4, s x 4, Ac), 2.57 (2H, br t, *J* 6.4 Hz, NCH2CH2NHBoc), 2.65 (4H, br t, *J* 6.1 Hz, NCH2CH2NHC(O)CH2SS x 2), 3.03 (4H, br t, *J* 6.3 Hz, NCH2CH2NHC(O)CH2SAc x 2), 3.10 (2H, br t, *J* 6.0 Hz, NCH2CH2NHBoc), 3.51 (s, 4H, NHC(O)CH2SS x 2), 3.24-3.31 (4H, m, SSCH2CHH’O), 3.80 (2H, dt, *J*d 10.5 Hz, *J*t 6.4Hz Hz, SSCH2CHH’O), 4.00 (2H, dt, *J*d 10.5 Hz, *J*t 6.5Hz Hz, SSCH2CHH’O), 3.96-4.08 (2H, m H-5), 4.14 (2H, dd, *J*5,6 2.4 Hz, *J*6,6’ 12.3 Hz, H-6), 4.24 (2H, dd, *J*6,6’ 12.3 Hz, *J*5,6’ 5.0 Hz, H-6’), 4.83 (2H, br s, H-1), 5.25-5.30 (6H, m H-2, H-3, H-4).

**1a**

1H NMR (CD3OD, 300 MHz) : 1.46 (9H, s, (CH3)3), 2.01, 2.02, 2.05, 2.08 (6H x 4, s, Ac), 2.54 (2H, br t, *J* 6.5 Hz, NCH2CH2NHBoc), 2.63 (4H, br t, *J* 6.6 Hz, NCH2CH2NHC(O)CH2SS x 2), 3.03 (4H, br t, *J* 6.5 Hz, NCH2CH2NHC(O)CH2SAc x 2), 3.12 (2H, br t, *J* 6.5 Hz, NCH2CH2NHBoc), 3.32 (3H, s, SSO2CH3), 3.45 (4H, s, NHC(O)CH2SS x 2), 3.75 (1H, ddd, H-5, *J*4,5 8.2Hz, *J*5,6 1.8Hz, *J*5,6' 3.9Hz), 4.10 (1H, dd, H-6, *J*5,6 1.8Hz, *J*6,6’ 11.9Hz), 4.26 (1H, dd, H-6’, *J*5,6’ 3.9Hz, *J*6,6' 11.9Hz), 4.58 (dd, 1H, H-2, *J*1,2 7.8Hz, *J*2,3 8.8Hz), 5.09 (pt, 1H, H-4, *J* 8.4Hz), 5.25 (1H, d, 1H, H-1, *J*1,2 7.8 Hz), 5.29 (pt, 1H, H-3, *J* 8.8Hz).


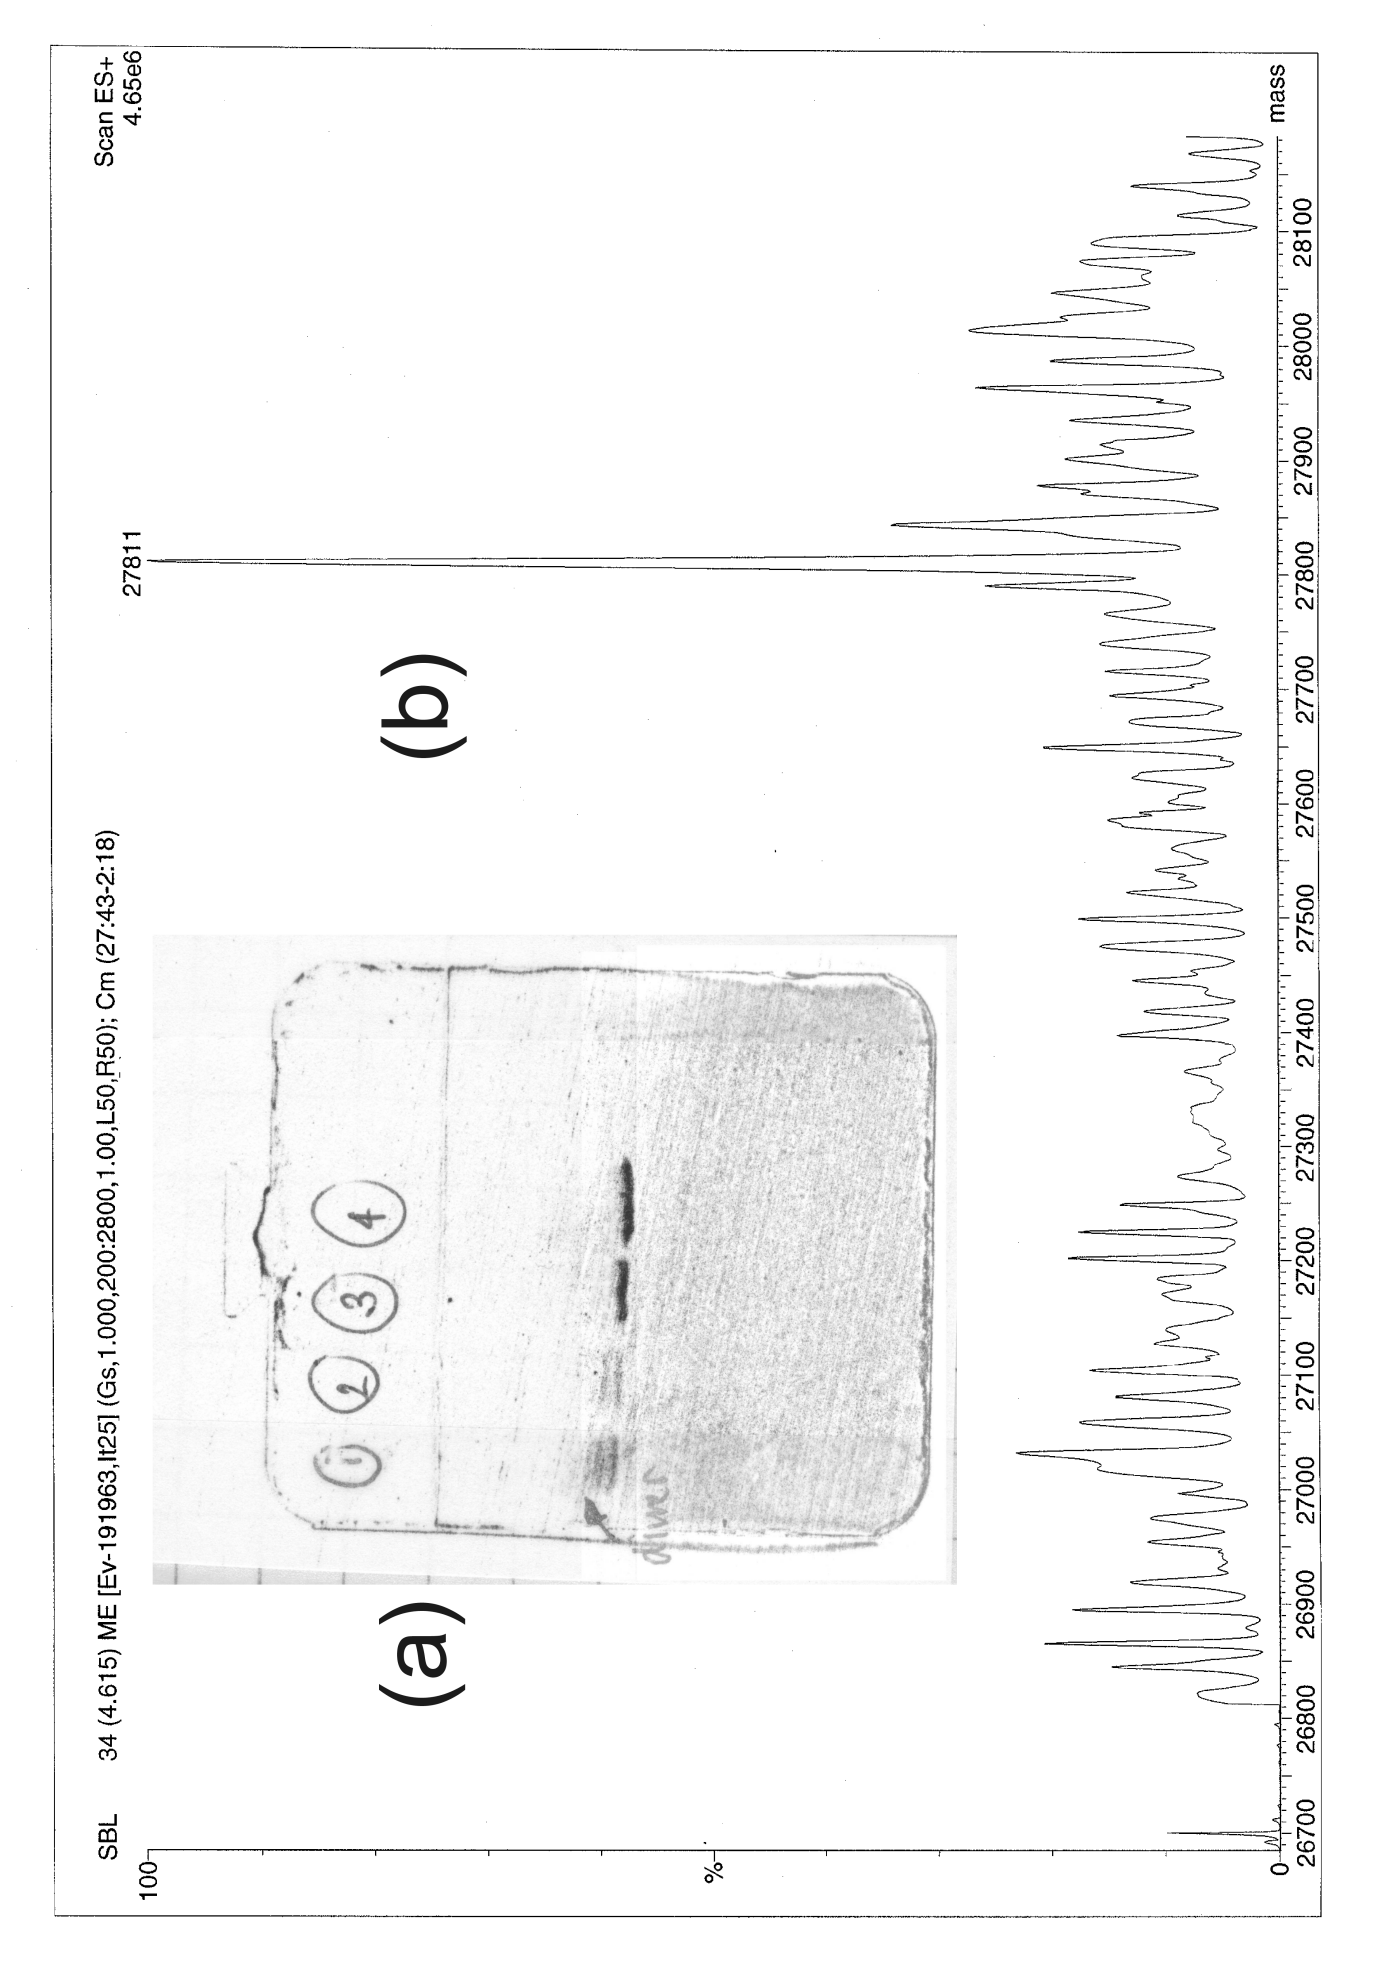

Supplement: b009184g.doc [file b009184g.doc]
